# Supplementary material for: High concentrations of biological aerosol particles and ice nuclei during and after rain
Source: Copernicus journal article supplement (doi:10.5194/acp-13-6151-2013), 2013-07-01
Supplement: Supplementary file [file acp-13-6151-2013-supplement.pdf]

## 1 **Supplementary Online Information (SOM)**

### 3 **Title: High concentrations of biological aerosol particles and ice nuclei during and** 4 **after rain**

5 **Authors:** J. A. Huffman<sup>1,2\*</sup>, A. J. Prenni<sup>3\*</sup>, P. J. DeMott<sup>3</sup>, C. Pöhlker<sup>2</sup>, R. H. Mason<sup>4</sup>, N. H.  
6 Robinson<sup>5</sup>, J. Fröhlich-Nowoisky<sup>2</sup>, Y. Tobo<sup>3</sup>, V. R. Després<sup>6</sup>, E. Garcia<sup>3</sup>, D. J. Gochis<sup>7</sup>, E.  
7 Harris<sup>2</sup>, I. Müller-Germann<sup>2</sup>, C. Ruzene<sup>2</sup>, B. Schmer<sup>2</sup>, B. Sinha<sup>2,8</sup>, D. A. Day<sup>9</sup>, M. O. Andreae<sup>2</sup>,  
8 J. L. Jimenez<sup>9</sup>, M. Gallagher<sup>5</sup>, S. M. Kreidenweis<sup>3</sup>, A. K. Bertram<sup>4\*</sup>, U. Pöschl<sup>2\*</sup>

### 9 **Affiliations:**

10 <sup>1</sup>Department of Chemistry & Biochemistry, University of Denver, 2190 E. Illif Ave., Denver,  
11 CO, 80208, USA.

12 <sup>2</sup>Max Planck Institute for Chemistry, P. O. Box 3060, D-55020, Mainz, Germany.

13 <sup>3</sup>Department of Atmospheric Science, Colorado State University, 1371 Campus Delivery, Fort  
14 Collins, CO, 80523, USA.

15 <sup>4</sup>Department of Chemistry, University of British Columbia, Room D223, 2036 Main Mall,  
16 Vancouver, BC, V6T1Z1, Canada.

17 <sup>5</sup>Centre for Atmospheric Sciences, University of Manchester, Simon Building, Oxford Road,  
18 Manchester, M139PL, UK.

19 <sup>6</sup>Institute for General Botany, Johannes Gutenberg University, Müllerweg 6, D-55099, Mainz,  
20 Germany.

21 <sup>7</sup>National Center for Atmospheric Research, PO Box 3000, Boulder, CO, 80307, USA.

22 <sup>8</sup>IISER Mohali, Department of Earth and Environmental Science, Sector 81, S. A. S. Nagar,  
23 Manauli PO, 140306, India.

24 <sup>9</sup>Cooperative Institute for Research in the Environmental Sciences and Department of Chemistry  
25 and Biochemistry, University of Colorado, Boulder, CO USA.

26 \* Correspondence to: alex.huffman@du.edu (J. A. H.); anthony.prenni@colostate.edu (A. J. P.);  
27 bertram@chem.ubc.ca (A. K. B.); u.poschl@mpic.de (U. P.)  
28

## 29 **Supplementary Materials:**

### 30 **S1 Materials and Methods**

#### 31 ***S1.1 Meteorological and Leaf Moisture Measurements***

32 Precipitation occurrence, rate and microphysical state (i.e., rain versus hail) were measured using  
33 a laser-optical disdrometer (PARTicle SIZE and VELOCITY ‘PARSIVEL’ sensor; OTT Hydromet  
34 GmbH, Kempton, Germany). Particle size is estimated from the magnitude of beam attenuation.  
35 Particle fall speed is determined from the duration of beam attenuation while overall  
36 precipitation rate and microphysical classification estimates are generated from a combination of  
37 the size and fall speed measurements. The sensor detects liquid hydrometeor particles ranging in  
38 size from 0.2 to 5 mm in diameter, solid hydrometeors ranging in size from 0.2 to 25 mm and  
39 provides estimates of particle velocities from 0.2 to 20 m/s.

40

#### 41 ***S1.2 UV-APS***

42 Aerosol sampling was performed with a volumetric flow of 5 L·min<sup>-1</sup> (LPM) at ambient pressure  
43 and temperature, split within the instrument into a sample flow of 1.0 ± 0.1 LPM and a sheath  
44 flow of 4.0 ± 0.1 LPM (pressure difference feedback control). The instrument was controlled and  
45 the measurement data were recorded with an external computer connected via serial port using  
46 the manufacturer’s Aerosol Instrument Manager software (TSI AIM; Shoreview, MN).

47

#### 48 ***S1.3 WIBS***

49 The waveband integrated bioaerosol sensor – model 4 (WIBS4; University of Hertfordshire,  
50 U.K.) is a dual channel single particle fluorescence spectrometer (Kaye et al., 2005; Foot et al.,  
51 2008; Gabey et al., 2010). The WIBS4 model is essentially the same as the WIBS3 model  
52 employed by Gabey et al. (2010), but with improved optics and electronics providing a more

53 precise signal. Baseline fluorescence is recorded by regularly measuring the internal fluorescence  
54 of the instrument when no particles are present. The increased precision of the model 4 WIBS  
55 allows for the detection of more weakly fluorescent particles than was possible using previous  
56 WIBS models.

57  
58 A subset of the WIBS4 single particle data (8000 particles) was analyzed using hierarchical  
59 agglomerative cluster analysis using a group average distance metric. This clustering was  
60 analyzed in five dimensions which were z-score normalized before analysis: the three  
61 fluorescence channels, size, and asymmetry. A suitable solution was assessed by inspecting the  
62 coefficient of determination and the root mean squared distance between clusters for each (e.g.  
63 Robinson et al., 2011). Concentration time series for each cluster were established by comparing  
64 each of the remaining particles to the centroid of each cluster. Each time series was apportioned  
65 a fraction of the particles' count which was inversely proportional to the distance of the particle  
66 from each cluster centroid (expressed in number of standard deviations of the centroid).

#### 68 ***S1.4 Filter and Impactor Aerosol Samples***

##### 69 ***S1.4.1 Sample Collection***

###### 70 ***S1.4.1.1 Cascade Aerosol Impactor (MOUDI)***

71 The MOUDI sampler provided aerosol fractionation according to the following aerodynamic  
72 diameter size cuts ( $D_{50}$ ,  $\mu\text{m}$ ) (Marple et al., 1991):

|    |         |      |
|----|---------|------|
| 73 | Stage 1 | 18.0 |
| 74 | Stage 2 | 10.0 |
| 75 | Stage 3 | 5.6  |

|    |          |       |
|----|----------|-------|
| 76 | Stage 4  | 3.2   |
| 77 | Stage 5  | 1.8   |
| 78 | Stage 6  | 1.0   |
| 79 | Stage 7  | 0.56  |
| 80 | Stage 8  | 0.32  |
| 81 | Stage 9  | 0.18  |
| 82 | Stage 10 | 0.10  |
| 83 | Stage 11 | 0.056 |

84 Stage 1 is typically referred to as the pre-impactor, and stages 2-11 refer to stages in the MOUDI  
85 impactor. Because we are interested in large particles we refer to the pre-impactor as Stage 1 and  
86 list all stages as 1-11. Thus, the numbering scheme utilized here is shifted lower by one with  
87 respect to the common usage for MOUDI samplers.

88  
89 MOUDI samples collected at the following times were analyzed by fluorescence microscopy and  
90 used for microscopic ice nucleation activation experiments as discussed in the manuscript:

|    |                   |                         |             |
|----|-------------------|-------------------------|-------------|
| 91 | M01 (dry period)  | 7/22 14:29 – 7/23 09:41 | (1152 min.) |
| 92 | M10 (rain period) | 8/2 05:55 – 8/3 05:55   | (1440 min.) |
| 93 | M26 (rain period) | 8/16 20:26 – 8/17 06:32 | (606 min.)  |
| 94 | M27 (dry period)  | 8/17 06:35 – 8/17 19:46 | (791 min.)  |

95  
96 Size distribution of ice nuclei shown in Figure 3C for dry periods are average of samples M1 and  
97 M27; Figure 3D for rain periods are average of samples M10 and M26. Corresponding time  
98 periods for UV-APS are identical to MOUDI sample periods.

99

100 ***S1.4.1.2 Glass Slide Impactor Samples***

101 Glass slide impactor samples collected at the following times are shown in Figures 3A and 3B  
102 and discussed in the manuscript:

|     |                   |                      |           |
|-----|-------------------|----------------------|-----------|
| 103 | G09 (dry period)  | 7/31 12:17 – 12:49   | (32 min.) |
| 104 | G21 (rain period) | 8/3 23:56 – 8/4 0:27 | (31 min.) |

105

106 ***S1.4.1.3 Nuclepore<sup>®</sup> Filters***

107 Stacked filter samples collected at the following times are discussed in the manuscript:

|     |                   |                    |            |
|-----|-------------------|--------------------|------------|
| 108 | S10 (dry period)  | 7/31 11:57 – 15:58 | (241 min.) |
| 109 | S12 (dry period)  | 7/31 19:58 – 23:55 | (237 min.) |
| 110 | S20 (rain period) | 8/4 3:52 – 8:04    | (252 min.) |
| 111 | S23 (rain period) | 8/4 16:23 – 20:24  | (261 min.) |

112

113 ***S1.4.2 Fluorescence Microscopy***

114 In Fig. 3A and 3B an overlay of fluorescent emission from all three fluorescence microscope  
115 channels (DAPI, GFP, TexasRed) onto a brightfield image of the same sample area is shown. For  
116 comparability the exposure times of the individual fluorescence images in Fig. 3A and 3B were  
117 set to the same values. The overlay image Fig. 3B is dominated by “blue-green” fluorescence  
118 indicating strong emissions in the DAPI ( $\lambda_{\text{ex}} = \sim 360 \text{ nm}$ ,  $\lambda_{\text{em}} = \sim 460 \text{ nm}$ ) and GFP  
119 ( $\lambda_{\text{ex}} = \sim 470 \text{ nm}$ ,  $\lambda_{\text{em}} = \sim 535 \text{ nm}$ ) channels. Blue-green fluorescence is characteristic for biological  
120 material and mainly originating from protein and coenzyme fluorophores (Pöhlker et al., 2012).  
121 In contrast “red-yellow” fluorescence is predominating in the overlay image in Fig. 3A

122 indicating strong emission in the TexasRed channel ( $\lambda_{\text{ex}} = \sim 560$  nm,  $\lambda_{\text{em}} = \sim 630$  nm). Red-yellow  
123 fluorescence is regarded to be somewhat characteristic/typical for mineral dust (Bozlee et al.,  
124 2005).

125

## 126 ***S1.5 Real-Time Ice Nucleation Measurements with CFDC***

### 127 ***S1.5.1 IN Measurements***

128 CFDC measurements were collected at the following times are shown in Figures 3E and 3F and  
129 discussed in the manuscript:

|     |                   |                    |            |
|-----|-------------------|--------------------|------------|
| 130 | C01 (rain period) | 8/2 10:27 – 17:57  | (450 min.) |
| 131 | C02 (dry period)  | 8/17 16:27 – 23:47 | (440 min.) |

132

133 Periods C01 and C02 correspond to sub-periods during MOUDI samples M10 and M27,  
134 respectively.

135

136 **References:**

- 137 Bozlee, B. J., Misra, A. K., Sharma, S. K. and Ingram, M.: Remote Raman and fluorescence  
138 studies of mineral samples, *Spectrochimica Acta Part a-Molecular and Biomolecular*  
139 *Spectroscopy*, 61, 2342-2348, 10.1016/j.saa.2005.02.033, 2005.
- 140 Foot, V. E., Kaye, P. H., Stanley, W. R., Barrington, S. J., Gallagher, M. and Gabey, A.: Low-  
141 cost real-time multi-parameter bio-aerosol sensors, *Proceedings of the SPIE - The International*  
142 *Society for Optical Engineering*, 711601 (711612 pp.), 10.1117/12.800226, 2008.
- 143 Gabey, A. M., Gallagher, M. W., Whitehead, J., Dorsey, J. R., Kaye, P. H. and Stanley, W. R.:  
144 Measurements and comparison of primary biological aerosol above and below a tropical forest  
145 canopy using a dual channel fluorescence spectrometer, *Atmospheric Chemistry and Physics*, 10,  
146 4453-4466, 10.5194/acp-10-4453-2010, 2010.
- 147 Kaye, P. H., Stanley, W. R., Hirst, E., Foot, E. V., Baxter, K. L. and Barrington, S. J.: Single  
148 particle multichannel bio-aerosol fluorescence sensor, *Optics Express*, 13, 3583-3593, 2005.
- 149 Marple, V. A., Rubow, K. L. and Behm, S. M.: A microorifice uniform deposit impactor  
150 (MOUDI) - description, calibration, and use, *Aerosol Sci. Technol.*, 14, 434-446,  
151 10.1080/02786829108959504, 1991.
- 152 Pöhlker, C., Huffman, J. A. and Pöschl, U.: Autofluorescence of atmospheric bioaerosols -  
153 fluorescent biomolecules and potential interferences, *Atmospheric Measurement Techniques*, 5,  
154 37-71, 10.5194/amt-5-37-2012, 2012.
- 155 Robinson, N. H., Newton, H. M., Allan, J. D., Irwin, M., Hamilton, J. F., Flynn, M., Bower, K.  
156 N., Williams, P. I., Mills, G., Reeves, C. E., McFiggans, G. and Coe, H.: Source attribution of  
157 Bornean air masses by back trajectory analysis during the OP3 project, *Atmospheric Chemistry*  
158 *and Physics*, 11, 9605-9630, 10.5194/acp-11-9605-2011, 2011.
- 159

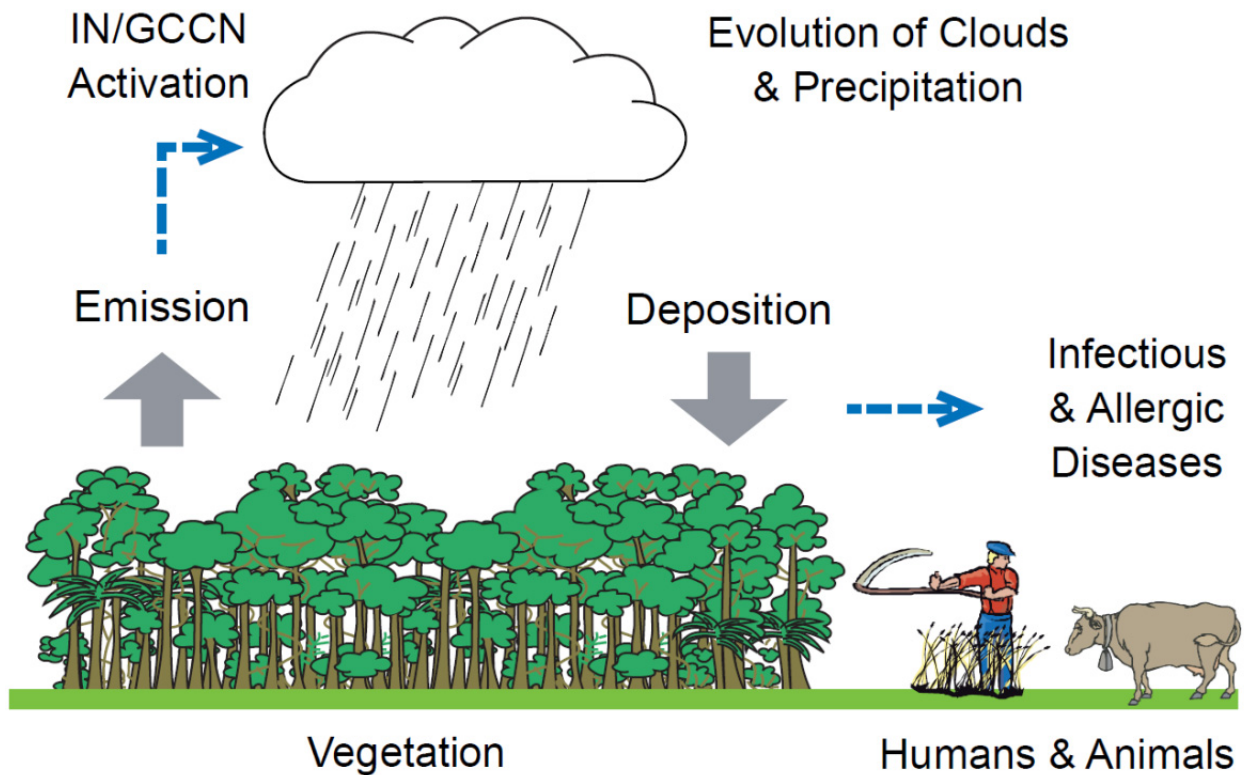

160

161 **Figure S1:** Coupling and effects of biological aerosol particles and precipitation: rain can  
 162 enhance bioparticle emissions (rain splash, active wet discharge, etc.); bioparticles serving as ice  
 163 nuclei or giant cloud condensation nuclei (IN/GCCN) can influence the evolution of clouds and  
 164 precipitation; deposition of pathogenic and allergenic species can trigger human, animal and  
 165 plant diseases.
